# Supplementary material for: Nocturnal “humming” vocalizations: adding a piece to the puzzle of giraffe vocal communication
Source: PubMed Central journal article supplement (PMC4565008; doi:10.1186/s13104-015-1394-3), 2015-09-09
Supplement: 13104_2015_1394_MOESM10_ESM.pdf [file 13104_2015_1394_MOESM10_ESM.pdf]

## Supplementary Table

Nocturnal “humming” vocalizations: adding a piece to the puzzle of giraffe vocal communication

Anton Baotic, Florian Sicks and Angela S. Stoeger

**Table S1 Temporal distributions of giraffe humming vocalizations from nocturnal acoustic recordings at three European zoos. Given for each analysed call are date (dd.mm.yy) and time of occurrence during data collection. Times for sunrise and sunset for each date are based on the current GPS location of each institution and were gathered from [www.sunearthtools.com](http://www.sunearthtools.com). All times (hh:mm) are given in CET (Central European Time)**

| Study site     | Call nr. | Date       | Time  | Sunrise | Sunset |
|----------------|----------|------------|-------|---------|--------|
| Copenhagen Zoo | 1        | 11.03.2014 | 04:00 | 06:36   | 18:05  |
| Copenhagen Zoo | 2        | 11.03.2014 | 04:00 | 06:36   | 18:05  |
| Copenhagen Zoo | 3        | 11.03.2014 | 04:00 | 06:36   | 18:05  |
| Copenhagen Zoo | 4        | 11.03.2014 | 04:00 | 06:36   | 18:05  |
| Copenhagen Zoo | 5        | 11.03.2014 | 04:11 | 06:36   | 18:05  |
| Copenhagen Zoo | 6        | 11.03.2014 | 04:11 | 06:36   | 18:05  |
| Copenhagen Zoo | 7        | 11.03.2014 | 04:11 | 06:36   | 18:05  |
| Copenhagen Zoo | 8        | 11.03.2014 | 04:15 | 06:36   | 18:05  |
| Copenhagen Zoo | 9        | 11.03.2014 | 04:16 | 06:36   | 18:05  |
| Copenhagen Zoo | 10       | 11.03.2014 | 04:55 | 06:36   | 18:05  |
| Copenhagen Zoo | 11       | 11.03.2014 | 04:55 | 06:36   | 18:05  |
| Copenhagen Zoo | 12       | 11.03.2014 | 04:55 | 06:36   | 18:05  |
| Copenhagen Zoo | 13       | 11.03.2014 | 04:55 | 06:36   | 18:05  |
| Copenhagen Zoo | 14       | 11.03.2014 | 04:55 | 06:36   | 18:05  |
| Copenhagen Zoo | 15       | 11.03.2014 | 04:56 | 06:36   | 18:05  |
| Copenhagen Zoo | 16       | 11.03.2014 | 04:56 | 06:36   | 18:05  |
| Copenhagen Zoo | 17       | 16.03.2014 | 04:22 | 06:23   | 18:15  |
| Copenhagen Zoo | 18       | 16.03.2014 | 04:22 | 06:23   | 18:15  |
| Copenhagen Zoo | 19       | 16.03.2014 | 04:23 | 06:23   | 18:15  |
| Copenhagen Zoo | 20       | 16.03.2014 | 04:23 | 06:23   | 18:15  |
| Copenhagen Zoo | 21       | 16.03.2014 | 04:23 | 06:23   | 18:15  |
| Copenhagen Zoo | 22       | 16.03.2014 | 04:24 | 06:23   | 18:15  |

|                 |    |            |       |       |       |
|-----------------|----|------------|-------|-------|-------|
| Berlin Tierpark | 23 | 23.06.2012 | 02:30 | 04:43 | 21:33 |
| Berlin Tierpark | 24 | 24.06.2012 | 21:23 | 04:44 | 21:33 |
| Berlin Tierpark | 25 | 24.06.2012 | 21:23 | 04:44 | 21:33 |
| Berlin Tierpark | 26 | 24.06.2012 | 04:06 | 04:44 | 21:33 |
| Berlin Tierpark | 27 | 24.06.2012 | 04:06 | 04:44 | 21:33 |
| Berlin Tierpark | 28 | 25.06.2012 | 23:32 | 04:44 | 21:33 |
| Berlin Tierpark | 29 | 25.06.2012 | 01:07 | 04:44 | 21:33 |
| Berlin Tierpark | 30 | 25.06.2012 | 01:08 | 04:44 | 21:33 |
| Berlin Tierpark | 31 | 27.06.2012 | 00:22 | 04:45 | 21:32 |
| Berlin Tierpark | 32 | 27.06.2012 | 01:16 | 04:45 | 21:32 |
| Berlin Tierpark | 33 | 28.06.2012 | 01:29 | 04:45 | 21:32 |
| Berlin Tierpark | 34 | 28.06.2012 | 01:29 | 04:45 | 21:32 |
| Berlin Tierpark | 35 | 28.06.2012 | 01:29 | 04:45 | 21:32 |
| Berlin Tierpark | 36 | 28.06.2012 | 01:29 | 04:45 | 21:32 |
| Berlin Tierpark | 37 | 29.06.2012 | 00:50 | 04:46 | 21:32 |
| Berlin Tierpark | 38 | 29.06.2012 | 00:55 | 04:46 | 21:32 |
| Berlin Tierpark | 39 | 29.06.2012 | 01:48 | 04:46 | 21:32 |
| Berlin Tierpark | 40 | 07.10.2011 | 04:09 | 07:16 | 18:30 |
| Berlin Tierpark | 41 | 11.10.2011 | 06:03 | 07:23 | 18:21 |
| Berlin Tierpark | 42 | 06.05.2014 | 02:55 | 05:25 | 20:40 |
| Berlin Tierpark | 43 | 06.05.2014 | 02:55 | 05:25 | 20:40 |
| Berlin Tierpark | 44 | 13.04.2014 | 03:55 | 06:13 | 20:00 |
| Berlin Tierpark | 45 | 13.04.2014 | 03:18 | 06:13 | 20:00 |
| Berlin Tierpark | 46 | 13.04.2014 | 07:03 | 06:13 | 20:00 |
| Berlin Tierpark | 47 | 16.04.2014 | 01:20 | 06:06 | 20:06 |
| Berlin Tierpark | 48 | 18.04.2014 | 23:19 | 06:02 | 20:09 |
| Berlin Tierpark | 49 | 20.04.2014 | 01:40 | 05:57 | 20:13 |
| Berlin Tierpark | 50 | 23.04.2014 | 00:13 | 05:51 | 20:18 |
| Berlin Tierpark | 51 | 26.04.2014 | 01:37 | 05:45 | 20:34 |
| Berlin Tierpark | 52 | 29.04.2014 | 02:05 | 05:38 | 20:28 |
| Berlin Tierpark | 53 | 04.05.2014 | 01:51 | 05:29 | 20:37 |
| Berlin Tierpark | 54 | 05.05.2014 | 00:00 | 05:27 | 20:38 |
| Berlin Tierpark | 55 | 06.05.2014 | 22:28 | 05:25 | 20:40 |
| Berlin Tierpark | 56 | 07.05.2014 | 22:21 | 05:23 | 20:42 |
| Vienna Zoo      | 57 | 02.10.2007 | 20:28 | 06:54 | 18:33 |
| Vienna Zoo      | 58 | 02.10.2007 | 20:29 | 06:54 | 18:33 |

|            |    |            |       |       |       |
|------------|----|------------|-------|-------|-------|
| Vienna Zoo | 59 | 03.10.2007 | 23:33 | 06:56 | 18:31 |
| Vienna Zoo | 60 | 03.10.2007 | 00:32 | 06:56 | 18:31 |
| Vienna Zoo | 61 | 03.10.2007 | 03:16 | 06:56 | 18:31 |
| Vienna Zoo | 62 | 27.03.2014 | 23:53 | 05:43 | 18:17 |
| Vienna Zoo | 63 | 27.03.2014 | 23:53 | 05:43 | 18:17 |
| Vienna Zoo | 64 | 26.03.2014 | 22:30 | 05:45 | 18:16 |
| Vienna Zoo | 65 | 05.04.2014 | 05:28 | 06:25 | 19:30 |

---
